# Supplementary material for: Integrated Analysis of Ulcerative Colitis Revealed an Association between PHLPP2 and Immune Infiltration
Source: Dis Markers. 2022 Mar 16;2022:4983471. doi: 10.1155/2022/4983471 (PMC8931176; doi:10.1155/2022/4983471)
Supplement: Supplementary 1 — Supplementary Table 1: differentially expressed miRNAs. [file 4983471.f1.txt]

id	logFC	P.Value	adj.P.Val
hsa-miR-155-5p	1.108456028	3.11E-07	0.000398778
hsa-miR-424-5p	1.339192797	9.39E-07	0.000803417
hsa-miR-192-5p	-1.15429718	4.55E-05	0.019704755
