# Supplementary material for: Integrated Analysis of Ulcerative Colitis Revealed an Association between PHLPP2 and Immune Infiltration
Source: Dis Markers. 2022 Mar 16;2022:4983471. doi: 10.1155/2022/4983471 (PMC8931176; doi:10.1155/2022/4983471)
Supplement: Supplementary 2 — Supplementary Table 2: differentially expressed genes. [file 4983471.f2.txt]

id	logFC	P.Value	adj.P.Val
COL1A2	1.657885109	6.84E-10	1.37E-05
CTSK	1.500476911	2.64E-09	2.65E-05
NPY	-2.642911313	1.39E-08	4.95E-05
NID1	1.123059262	1.91E-08	4.95E-05
IGFBP5	1.387894704	1.97E-08	4.95E-05
SPARC	1.051155538	3.95E-08	8.58E-05
C2CD4B	2.005089833	6.37E-08	8.58E-05
CXCL3	3.301768089	6.53E-08	8.58E-05
COL4A1	1.609891349	6.56E-08	8.58E-05
COL6A3	1.650775269	6.91E-08	8.58E-05
LOXL2	1.341301227	1.38E-07	0.000125579
COL4A2	1.08207418	1.66E-07	0.000139658
TMEM72	-1.645947577	1.67E-07	0.000139658
CXCL1	3.421786914	2.55E-07	0.000153912
RGS5	1.332129034	2.92E-07	0.000153912
NFKBIZ	1.153006694	2.93E-07	0.000153912
FOXQ1	2.18506149	2.99E-07	0.000153912
GUCY1B3	1.009819196	3.10E-07	0.000155527
TINAG	-1.113777885	3.49E-07	0.000159355
CCL11	2.798967448	3.86E-07	0.000159626
IGHG1	2.493810076	4.44E-07	0.000178154
COL1A1	1.338676302	4.60E-07	0.000180895
IGDCC4	1.019921029	5.56E-07	0.000202862
LUM	1.298258363	7.95E-07	0.000262029
PDE6A	-1.450072998	8.31E-07	0.000262029
COL5A2	1.152253991	1.08E-06	0.000285167
FSTL1	1.006292974	1.13E-06	0.000290128
C1R	1.048618898	1.18E-06	0.000290128
CXCL2	2.312586201	1.19E-06	0.000290128
CXCL6	2.725999882	1.23E-06	0.000293888
CPM	-1.007961022	1.24E-06	0.000293888
MYZAP	-1.016976309	1.32E-06	0.000304418
TMCC3	-1.040929249	1.52E-06	0.000339595
COL18A1	1.067774899	1.53E-06	0.000339595
COL12A1	1.613382923	1.54E-06	0.000339595
SLC13A2	-1.658449429	1.62E-06	0.000353007
ABCB1	-1.079162249	1.73E-06	0.000361648
PPARGC1A	-1.148971988	1.76E-06	0.00036326
RHOU	-1.18584988	1.82E-06	0.000368168
IGHG1	2.181239943	1.84E-06	0.000368168
SLC22A5	-1.001366227	1.87E-06	0.000368168
IGFBP7	1.043514542	1.87E-06	0.000368168
EDN3	-1.027132994	2.00E-06	0.000370947
CCL2	1.15605807	2.10E-06	0.000375019
CWH43	-1.438284799	2.17E-06	0.000376572
CES2	-1.124480683	2.40E-06	0.000398069
THY1	1.31437822	2.45E-06	0.000400499
NAP1L2	-1.153189255	2.89E-06	0.00043429
SLC17A4	-1.561693292	2.90E-06	0.00043429
TRPM6	-1.867644182	2.97E-06	0.000440898
CDKN2B	-1.403507797	3.20E-06	0.000461325
SPON2	1.293357763	3.45E-06	0.000480605
LTBP2	1.210656397	3.67E-06	0.000507424
REG3A	6.136145619	3.72E-06	0.000510838
TMEM158	1.590699261	4.01E-06	0.000529732
OTOP2	-1.676107598	4.68E-06	0.00057982
CPXM1	1.348161774	4.73E-06	0.00057982
NMU	1.030913716	4.99E-06	0.000596466
PADI2	-1.439404839	5.14E-06	0.000604704
MYOT	-1.270747513	5.32E-06	0.000609612
SLC6A14	3.362395291	6.38E-06	0.000663092
VWF	1.043922351	6.65E-06	0.000681283
HSD17B2	-1.315488873	6.70E-06	0.000681283
PHLPP2	-1.077061255	6.72E-06	0.000681283
PHLDA1	1.051333269	7.03E-06	0.000696109
GUCA2A	-2.235929671	7.11E-06	0.00069616
PDPN	1.112773645	9.10E-06	0.000780425
LAMA1	-1.183269948	9.93E-06	0.000841177
C9orf24	-1.176656279	9.93E-06	0.000841177
PDZK1IP1	1.696914679	1.02E-05	0.000845478
DEFA5	4.723485155	1.05E-05	0.000857676
GUCA2B	-2.335603749	1.10E-05	0.000865583
GPX8	1.291284591	1.13E-05	0.000868704
ITPKA	-1.065019225	1.16E-05	0.000886395
SLC35G1	-1.01753227	1.24E-05	0.000915957
TNC	1.714664424	1.25E-05	0.000923081
LPCAT1	1.348615108	1.52E-05	0.00101122
LCN2	2.93463792	1.59E-05	0.001032222
SRD5A3	1.149184555	1.61E-05	0.001040571
SELENBP1	-1.42172562	1.81E-05	0.001121773
IGKV2-28	1.808801403	1.85E-05	0.001130025
MEP1A	-1.078792433	1.87E-05	0.001130025
C2CD4A	1.859533437	2.01E-05	0.001153123
TNFRSF6B	1.480419564	2.04E-05	0.001154493
ELOVL5	1.040692475	2.09E-05	0.001169319
VLDLR	-1.616572424	2.16E-05	0.00118623
CCL20	1.809042759	2.30E-05	0.00123699
CCL24	1.018128584	2.44E-05	0.001289247
CHI3L1	4.074219057	2.52E-05	0.001291526
DUOXA2	3.293544143	2.62E-05	0.001304954
BACE2	1.012348525	2.67E-05	0.001316218
RNF183	1.138264277	2.68E-05	0.001317471
ADIRF	-1.263156237	2.83E-05	0.001355671
ABCA8	-1.778287953	2.83E-05	0.001355671
SOCS3	1.297146452	3.33E-05	0.001462146
SAA2-SAA4	2.990323556	3.45E-05	0.001486945
PTGDS	2.01636799	3.50E-05	0.00149304
SLC16A9	-1.233851484	3.96E-05	0.001565351
ADAMTS5	1.006732777	4.00E-05	0.001574689
C2	1.072179846	4.07E-05	0.001585222
NOS2	2.06557728	4.32E-05	0.001638523
ACSF2	-1.072555043	4.35E-05	0.001643423
CLDN8	-3.621137946	4.44E-05	0.001666999
XBP1	1.005979043	4.51E-05	0.00168217
DHRS11	-1.024164975	4.56E-05	0.001694814
VNN1	1.717894568	4.70E-05	0.001722831
TGFBI	1.060949069	4.72E-05	0.001724613
THRB	-1.169178751	4.81E-05	0.001750964
DAPP1	1.122400724	5.27E-05	0.001852005
ANK3	-1.135286587	5.28E-05	0.001852005
TMIGD1	-2.040551881	5.65E-05	0.00194032
ANKRD20A1	-1.361765275	5.80E-05	0.001973875
CXCL1	1.655151663	6.05E-05	0.002023567
SLC4A4	-1.111553326	6.09E-05	0.002033268
CAPN13	-1.072656992	6.12E-05	0.002033268
GPR183	1.036884833	6.59E-05	0.002088891
PI3	2.922442085	6.82E-05	0.002128471
IGKC	1.424170779	6.83E-05	0.002128494
DEFB1	-1.275285709	7.08E-05	0.002170794
CD160	-1.051171041	7.08E-05	0.002170794
UGT2A3	-1.333333843	7.12E-05	0.00217403
PLAU	1.266101532	7.24E-05	0.002197855
CXCL8	2.631630053	7.32E-05	0.002212351
PRSS2	1.798277362	7.46E-05	0.00224022
ANXA1	1.386152739	8.07E-05	0.002364231
EGFL6	1.676695052	8.65E-05	0.00247309
NBPF1	-1.132870438	8.73E-05	0.002491301
REG4	2.480938315	8.85E-05	0.00250289
LYZ	1.046495811	8.95E-05	0.002518169
MMP12	2.693562956	9.73E-05	0.002628078
DEFA6	3.732491268	9.78E-05	0.002628078
CA7	-1.454437829	9.92E-05	0.002638545
NEUROD1	-1.388729881	0.000105683	0.002743786
TPST2	1.029901946	0.00010606	0.002746487
IL1B	1.759106525	0.00010704	0.002764731
MMRN1	1.021726668	0.000110568	0.002812411
SPINK4	2.538647835	0.000111635	0.002835944
RUNDC3B	-1.385889289	0.000115881	0.002887935
SCNN1B	-1.42068513	0.000120651	0.002952436
BEST4	-1.968459805	0.000121543	0.002957108
MGP	1.055678445	0.000121709	0.002957108
PTGDR	-1.069062899	0.000124837	0.003007632
AIM1L	-1.147811402	0.000129692	0.003087535
TIMP1	1.410493591	0.000133651	0.003151862
CHP2	-1.973246422	0.000136922	0.003184106
C4BPA	2.115452917	0.00013893	0.003214798
ENTPD5	-1.213343338	0.000140819	0.003229828
SAA1	2.308307621	0.00015104	0.003383067
CD55	1.613087641	0.000152328	0.003398077
KYNU	1.696119255	0.000157171	0.003447288
L1TD1	1.82291358	0.000161503	0.003492618
DERL3	1.071108001	0.000167268	0.003567374
CLEC4A	1.133645048	0.000172671	0.003635743
CSTA	1.124688297	0.000172813	0.003635743
BMP3	-1.609764464	0.000180633	0.003716912
CLC	2.446280458	0.000180989	0.003716912
MMP7	3.03004634	0.000195031	0.003879174
FKBP11	1.196917037	0.000196504	0.003896873
TDO2	1.495179723	0.000200618	0.003943664
BASP1	1.040288614	0.000215545	0.004147262
MMP9	2.053449918	0.000215628	0.004147262
REG1A	5.904398836	0.000222781	0.004235164
IGLL3P	1.108899913	0.000238257	0.00439484
SIK1	1.120327349	0.000240842	0.004394882
CCL4	1.275783571	0.000255514	0.0045271
S100A9	2.951414204	0.000272561	0.00468767
ABCG2	-1.628911578	0.000272819	0.00468767
EGR2	1.002256709	0.00027952	0.004753965
MMP10	3.167939353	0.000286617	0.004789439
SAA2	1.50371348	0.000294389	0.004878931
C3	1.971943727	0.000298768	0.004930896
PRRX1	1.057324868	0.000309397	0.005034678
S100A8	2.935650772	0.000311324	0.005046812
CKB	-1.292799939	0.000320084	0.005159364
CD79A	1.029111264	0.000340691	0.005392218
C12orf36	-1.263504864	0.000354101	0.005508873
CDHR1	-1.463178483	0.000355759	0.005526101
IGLV1-40	1.339002391	0.000365646	0.005606551
GHR	-1.289679971	0.00036662	0.005606551
LY96	1.128581199	0.000373891	0.005682145
CTHRC1	1.417794993	0.000390476	0.005830708
CASP1	1.129765233	0.000396879	0.005891245
IGKV1-27	1.034268747	0.000411696	0.006030899
APIP	1.041702614	0.000416967	0.006077066
GREM1	1.621945579	0.000430669	0.006209126
CPA6	-1.04241728	0.000468505	0.006534752
ALDOB	1.229313066	0.000473128	0.006569175
SST	-2.267005172	0.000473318	0.006569175
CFB	1.393919213	0.000473831	0.006571739
SRGN	1.037563068	0.000511261	0.006914088
OLFM4	2.680027981	0.000533375	0.007079571
SLC26A2	-1.763366568	0.000538528	0.007124399
REG1B	3.122617791	0.00054085	0.007136306
LILRB2	1.010481629	0.000563264	0.007330831
PYY	-1.543973173	0.000564709	0.007340116
NXPE4	-1.006181139	0.000565641	0.007347472
DPP4	-1.112042966	0.000593499	0.00758175
CD38	1.582793468	0.000604357	0.007691083
CLEC4E	1.179094693	0.000617686	0.007767124
IL1R2	-1.23345054	0.000620721	0.007797592
DEFB4A	2.036809503	0.000657468	0.008104871
MMP3	3.650584035	0.000696721	0.008448632
MZB1	1.457394927	0.000699997	0.008457695
PTN	-1.072330521	0.000711957	0.008518699
NNMT	1.201795031	0.00072085	0.008575417
LAX1	1.271168998	0.00074817	0.008746029
KLRC1	-1.130504181	0.000831421	0.009391233
FPR1	1.442424167	0.000836195	0.009411998
TNIP3	1.473675556	0.000852033	0.009547437
DUOX2	3.099693682	0.000873442	0.00967292
HMGCS2	-2.427102627	0.000876621	0.009693064
APOBEC1	1.62901209	0.000883026	0.009726374
TCN1	2.016964674	0.000889176	0.009772662
ALDH1A2	1.654404467	0.00099225	0.01050842
IGLV1-44	1.386109785	0.001007745	0.010610933
AQP8	-2.869758215	0.00104281	0.010772552
CFI	1.38305903	0.001047506	0.010791782
PCK1	-2.251097917	0.001076577	0.010964061
AQP9	1.149080045	0.00109611	0.011010083
ADH1C	-1.344030314	0.001115751	0.011162516
PIM2	1.039474595	0.001121726	0.011199956
UGT1A1	-1.09432384	0.001143367	0.011326903
KANK4	-1.00414864	0.001194211	0.011652295
BEST2	-1.171020283	0.001281743	0.012225904
MMP1	2.726292444	0.001286663	0.012249548
PTGS2	1.036311708	0.001299519	0.012319341
SPAG4	1.078400908	0.001307036	0.012351055
IGHM	1.125034638	0.001482787	0.013398495
SLC16A1	-1.020684634	0.001493193	0.013452144
BCL2A1	1.344279061	0.001634492	0.014213091
FAM151A	-1.098004067	0.001777975	0.015038953
CYR61	1.439305866	0.00177807	0.015038953
ANPEP	-1.4280921	0.002065268	0.016506519
IGLJ3	1.596171606	0.002252701	0.017408341
MUC17	-1.128375022	0.002331259	0.017816463
DMBT1	2.106380136	0.002391365	0.018175523
MNDA	1.177923578	0.00259242	0.019085577
ME1	1.092237298	0.002775962	0.01999669
CEMIP	1.098205923	0.003269963	0.022212963
MUC12	-1.007262649	0.003477068	0.023190855
SERPINA3	1.155396599	0.003615438	0.02378958
MT1H	-1.176216943	0.003703978	0.024215748
C21orf88	-1.96788378	0.003774178	0.024512618
GZMK	1.164304588	0.004028602	0.025605459
NPTX2	1.054391503	0.004041273	0.025657802
CA1	-1.817719655	0.004629765	0.028113894
IDO1	1.514435944	0.004759481	0.028610339
SCUBE2	-1.071676319	0.004802803	0.028798165
CASP5	1.439662699	0.004965423	0.029561281
GBP5	1.120577844	0.005179728	0.030493389
AGT	1.108379324	0.005181781	0.030494723
B3GNT7	-1.105281578	0.005713775	0.032542614
RP11-216L13.19	-1.047528411	0.006150046	0.034010822
CXCL5	2.045979775	0.006247787	0.034380815
MS4A12	-1.142797057	0.006456262	0.035209437
EGR1	1.469647576	0.006877353	0.036756749
FCGR3B	1.848881007	0.0073538	0.038423177
ITLN2	1.129885216	0.00833062	0.041786355
PDZK1	-1.684014893	0.008583887	0.042556824
SCG2	-1.06057073	0.009199704	0.044661067
PNLIPRP2	-1.9738671	0.009921078	0.046936847
SERPINB5	1.260949823	0.009949555	0.047059809
MT1G	-1.183347568	0.009964853	0.047099539
MT1JP	-1.259578566	0.010344955	0.048259626
